# Supplementary material
Source: PubMed Central journal article supplement (PMC10881062)

Source Data: Unprocessed gels from Extended Data Figures 2j, 3h, and 4c

a Extended Data Figure 2j

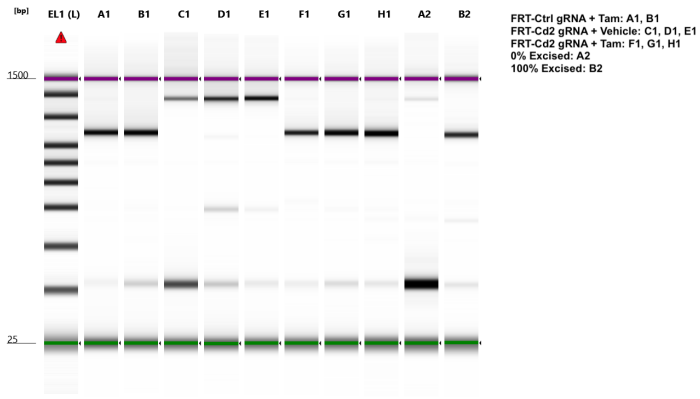

b Extended Data Figure 3h

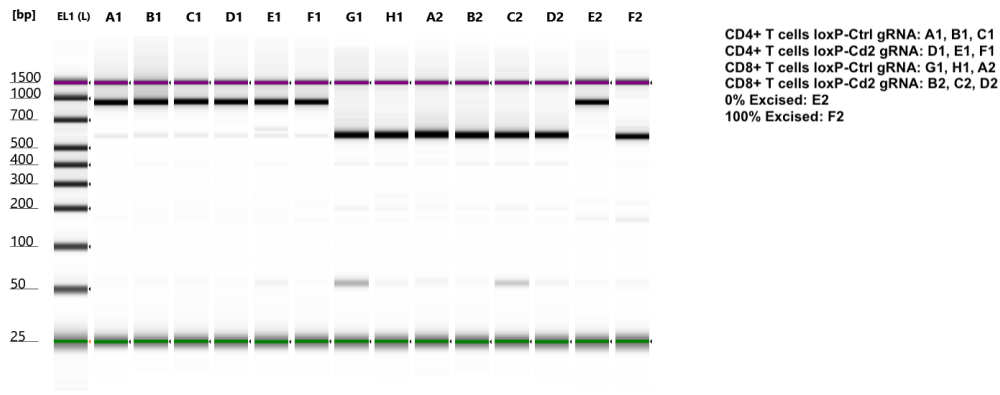

c Extended Data Figure 4c

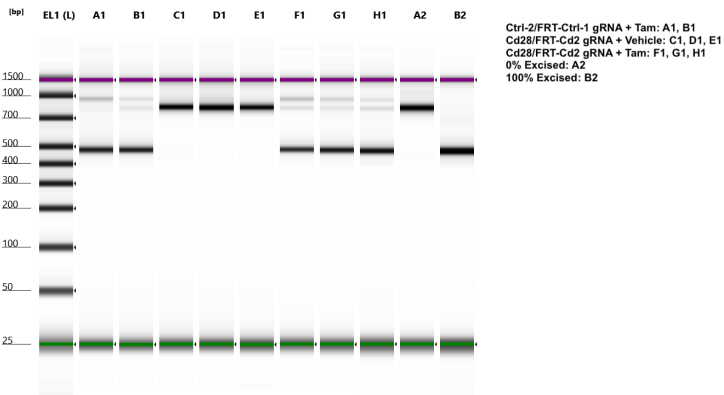

Supplement: NIHMS1960324-supplement-Gel_Source_Data.pdf [file NIHMS1960324-supplement-Gel_Source_Data.pdf]
